# Supplementary material
Source: publisher site journal article supplement (https://www.dovepress.com/article/452609)
Supplement: Supplementary file 1 [file get_supplementary_file.php]

Supplementary Files

Supplementary Table 1. Primer Sequences

| Gene | Forward primer (5’-3’) | Reverse primer (5’-3’) |
| --- | --- | --- |
| SLC31A1 | ACCATGCAACCTTCTCACCA | AAAAGCTCCAGCCATTTCTCCA |
| ADNP | GCCTAGTGGTTATGCCCTGT | CTGCTACGGTATTCGGTGTG |
| DLD | CCCAGCGGAGGTGAAAGTAT | TACATCAGCATCAATCGGCT |
| LIAS | GATGCCAGTGAGCCCTACAAT | CTCCCCCATCAGGCATATCATC |
| PDHA1 | CTCAGAAGCCGGCAAGCA | CTCCATTCGGCGTACAGTCT |
| PDHB | GAAGAGGCGCTTTCACTGG | AGCCCTCGACTAACCTTGTATG |
| HEPH | GACCCAGACTTTGCCCTACC | CCATGGCCCACATTACTTTTGT |
| MT1F | TCCTGCAAGAAGAGCTGCTG | AGCAAATGGGTCAAGGTGGT |
| DLAT | TCAGCAACATTCGTCGGGTTA | TGCTTCTCCCTTCTAATATCTGG |
| CUTC | GATGGTTTGGTTTTTGGGGCA | ACCATGTCAAAGGCTCGGTG |
| ACTB | GCCGCCAGCTCACCAT | TCGTCGCCCACATAGGAATC |


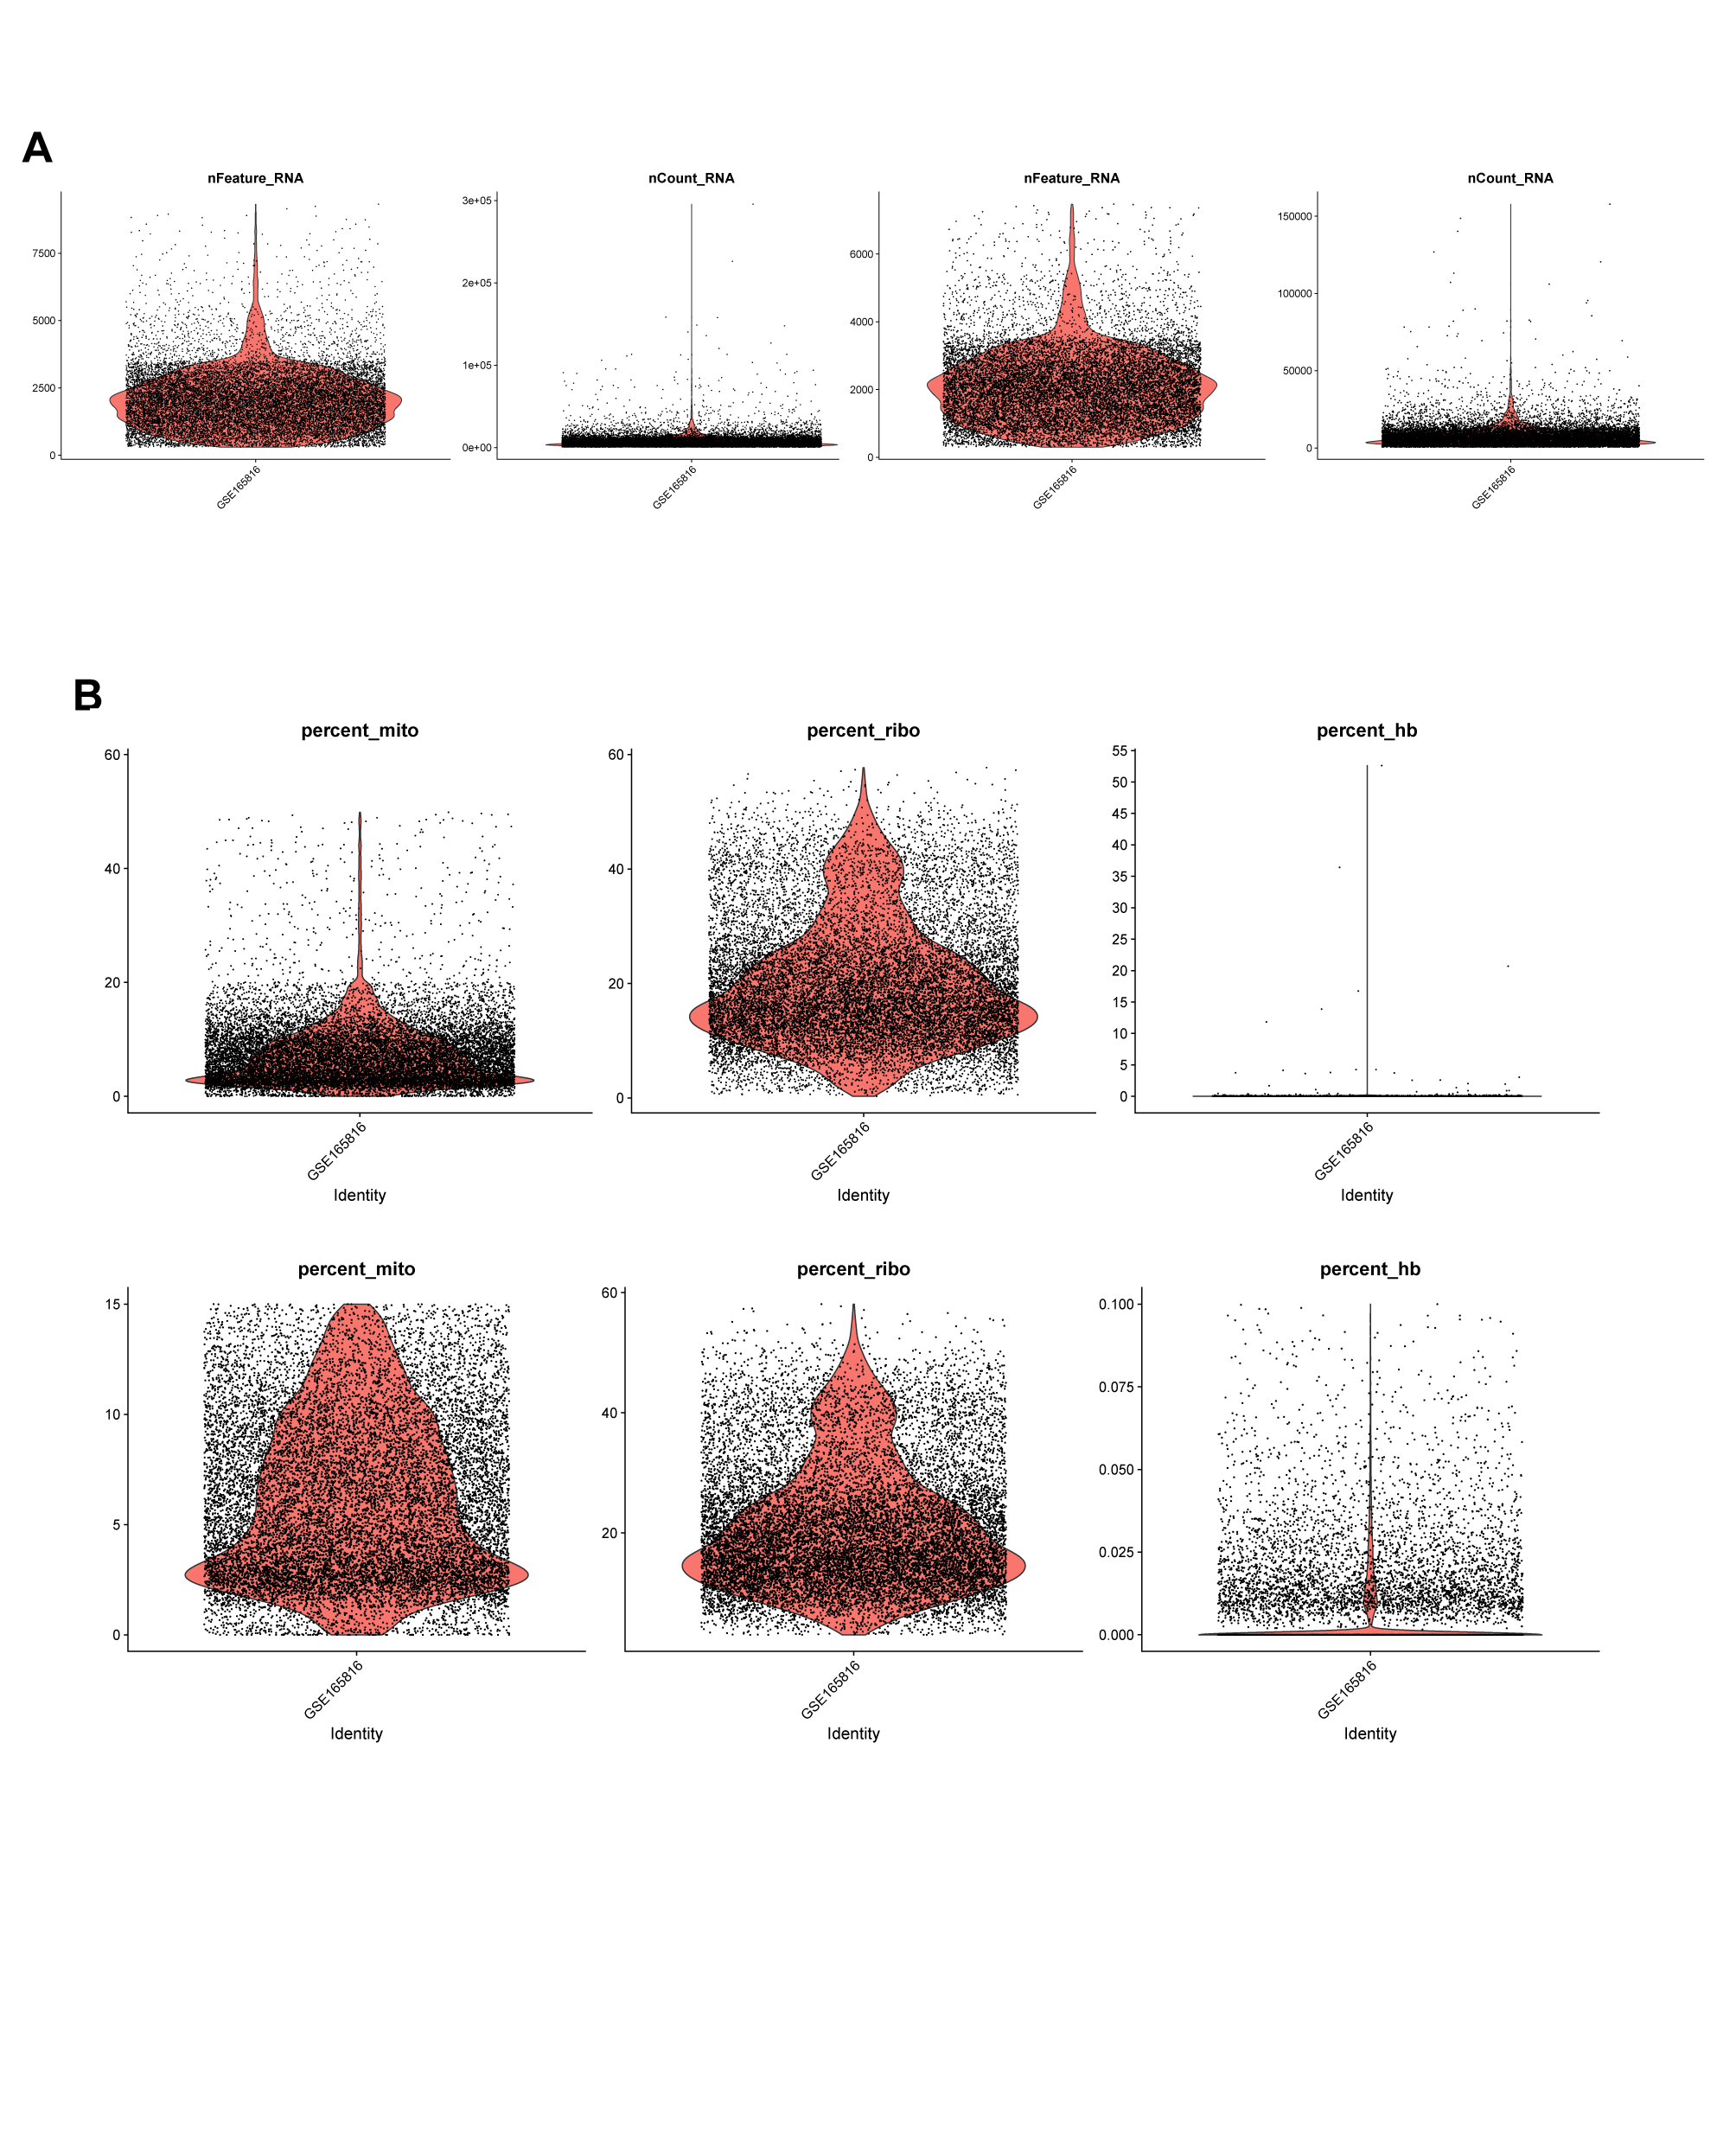


Supplementary Figure 1. Quality Control of Single-Cell RNA Sequencing Data. (A) Gene counts and number of unique molecular identifiers per cell of the single-cell RNA-seq data before and after quality control. (B) Percentage of mitochondrial genes, ribosome genes, and hemoglobin genes per cell in the single-cell RNA-seq data before and after quality control.
